# Supplementary material for: Sustenance Trial to Analyze the Effects of Black Soldier Fly Larvae Meal on the Reproductive Efficiency of Sows and the Hematological Properties of Suckling and Weaning Piglets
Source: MDPI journal article supplement (doi:10.3390/ani13213410), 2023-11-03
Supplement: s1 [file s1]

# Sustenance trial to analyze the effects of black soldier fly larvae meal on the reproductive efficiency of sows and the hematological properties of suckling and weaning piglets

Kiyonori Kawasaki <sup>1\*</sup>, Junliang Zhao <sup>1</sup>, Natsu Takao <sup>1</sup>, Masaki Sato <sup>1</sup>, Takuma Ban <sup>1</sup>, Kaoru Tamamaki <sup>1</sup>, Masanori Kagami <sup>1</sup>, Kiminobu Yano <sup>2</sup>

<sup>1</sup> Department of Applied Biological Science, Faculty of Agriculture, Kagawa University, Ikenobe 2393, Miki-cho, Kita-gun, Kagawa 761-0795, Japan.

<sup>2</sup> University Farm, Kagawa University, Showa 300-2, Sanuki, Kagawa 769-2304, Japan.

\* Correspondence: [kawasaki.kiyonori@kagawa-u.ac.jp](mailto:kawasaki.kiyonori@kagawa-u.ac.jp); +81-87-891-3061

## Supplementary Data

Table S1. Parity number of the sows.

| C   |        | L   |        | H   |        |
|-----|--------|-----|--------|-----|--------|
| Sow | Parity | Sow | Parity | Sow | Parity |
| C1  | Gilt   | L1  | Gilt   | H1  | Gilt   |
| C2  | Gilt   | L2  | Gilt   | H2  | Gilt   |
| C3  | Gilt   | L3  | Gilt   | H3  | Gilt   |
| C4  | Gilt   | L4  | Gilt   | H4  | Gilt   |
| C5  | Gilt   | L5  | Gilt   | H5  | Gilt   |
| C6  | Gilt   | L6  | 1      | H6  | 1      |
| C7  | 1      | L7  | 1      | H7  | 1      |
| C8  | 1      | L8  | 1      | H8  | 1      |
| C9  | 1      | L9  | 1      | H9  | 1      |
| C10 | 2      | L10 | 2      | H10 | 1      |

Table S2. Body weight and sex of the weaned piglets in each pen.

| C   |        |                  | L   |        |                  | H   |        |                  |
|-----|--------|------------------|-----|--------|------------------|-----|--------|------------------|
| Pen | Sex    | Body weight (kg) | Pen | Sex    | Body weight (kg) | Pen | Sex    | Body weight (kg) |
| C1  | Barrow | 10.46            | L1  | Barrow | 9.70             | H1  | Barrow | 8.69             |
|     | Barrow | 9.79             |     | Gilt   | 11.79            |     | Barrow | 10.16            |
|     | Barrow | 8.42             |     | Gilt   | 11.71            |     | Barrow | 10.54            |
|     | Gilt   | 10.01            |     | Gilt   | 12.57            |     | Barrow | 9.57             |
|     | Gilt   | 8.26             |     | Gilt   | 11.54            |     | Barrow | 10.09            |
|     | Gilt   | 8.93             |     | Gilt   | 9.95             |     | Gilt   | 8.34             |
| C2  | Barrow | 9.24             | L2  | Barrow | 9.63             | H2  | Barrow | 10.21            |
|     | Barrow | 8.28             |     | Barrow | 9.11             |     | Barrow | 9.50             |
|     | Barrow | 8.09             |     | Gilt   | 9.65             |     | Barrow | 8.51             |
|     | Gilt   | 11.67            |     | Gilt   | 9.96             |     | Gilt   | 6.31             |
|     | Gilt   | 12.92            |     | Gilt   | 9.58             |     | Gilt   | 8.56             |
|     | Gilt   | 9.25             |     | Gilt   | 8.25             |     | Gilt   | 9.58             |
| C3  | Barrow | 8.29             | L3  | Barrow | 13.59            | H3  | Barrow | 8.53             |
|     | Barrow | 7.68             |     | Barrow | 6.06             |     | Barrow | 8.37             |
|     | Barrow | 6.94             |     | Gilt   | 10.77            |     | Barrow | 6.98             |
|     | Gilt   | 9.79             |     | Gilt   | 11.40            |     | Gilt   | 8.77             |
|     | Gilt   | 7.29             |     | Gilt   | 9.36             |     | Gilt   | 6.52             |
|     | Gilt   | 7.61             |     | Gilt   | 7.40             |     | Gilt   | 7.16             |
| C4  | Barrow | 7.00             | L4  | Barrow | 7.14             | H4  | Barrow | 7.29             |
|     | Barrow | 10.29            |     | Barrow | 7.24             |     | Barrow | 8.57             |
|     | Barrow | 8.71             |     | Gilt   | 7.37             |     | Barrow | 9.01             |
|     | Barrow | 8.41             |     | Gilt   | 7.36             |     | Barrow | 8.94             |
|     | Barrow | 8.30             |     | Gilt   | 10.28            |     | Barrow | 8.08             |
|     | Gilt   | 7.61             |     | Gilt   | 12.83            |     | Barrow | 7.63             |
| C5  | Barrow | 7.86             | L5  | Barrow | 12.28            | H5  | Barrow | 6.75             |
|     | Barrow | 7.94             |     | Barrow | 9.20             |     | Barrow | 7.42             |
|     | Gilt   | 8.73             |     | Barrow | 9.90             |     | Barrow | 8.47             |
|     | Gilt   | 7.60             |     | Barrow | 9.12             |     | Barrow | 8.63             |
|     | Gilt   | 8.83             |     | Gilt   | 7.44             |     | Barrow | 8.90             |
|     | Gilt   | 7.71             |     | Gilt   | 7.41             |     | Barrow | 8.94             |
